# Supplementary material
Source: bioRxiv or medRxiv preprint supplement (https://www.biorxiv.org/highwire/filestream/47047/field_highwire_adjunct_files/5/137695-5.pdf)

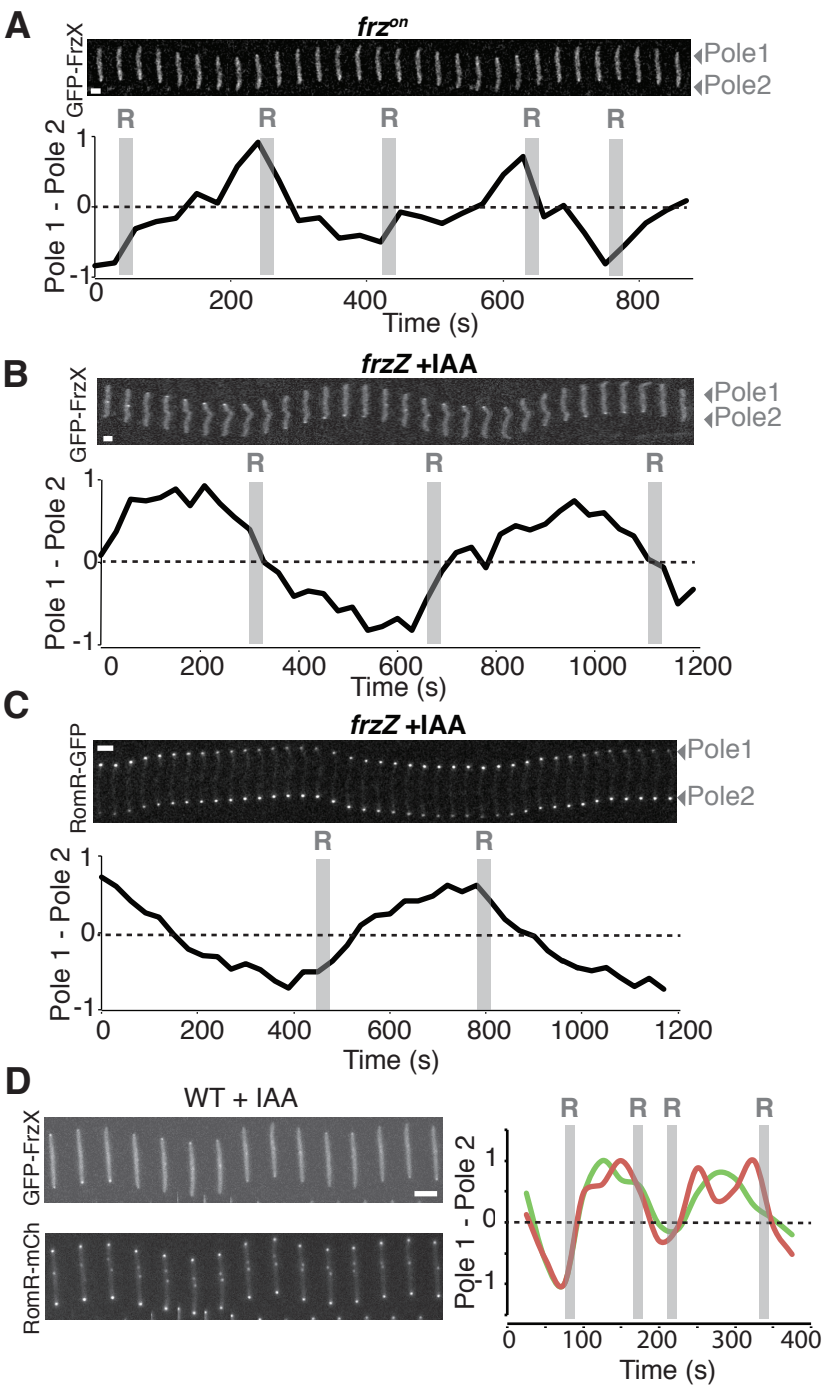

Supplement: Supplementary file [file 137695-5.pdf]
